# Supplementary material
Source: PubMed Central journal article supplement (PMC555466)

**a**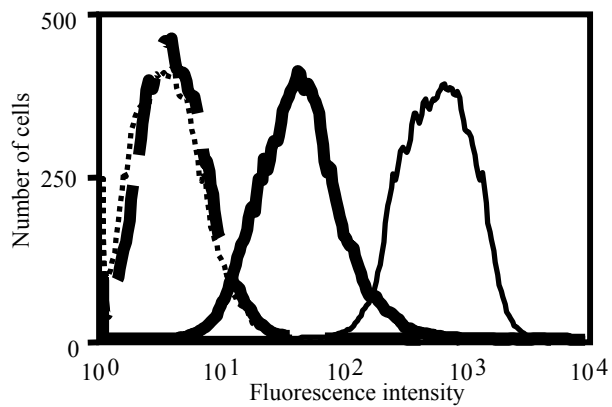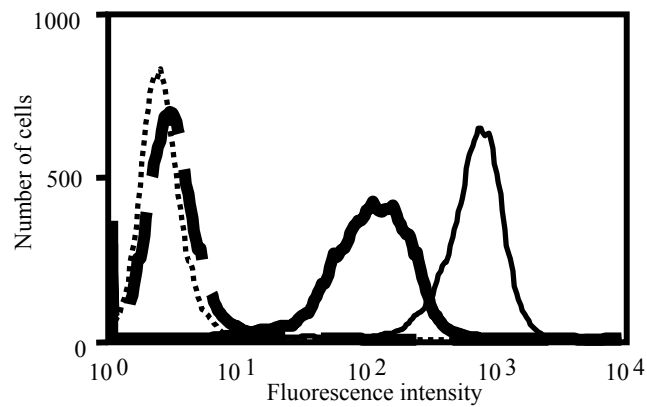**b**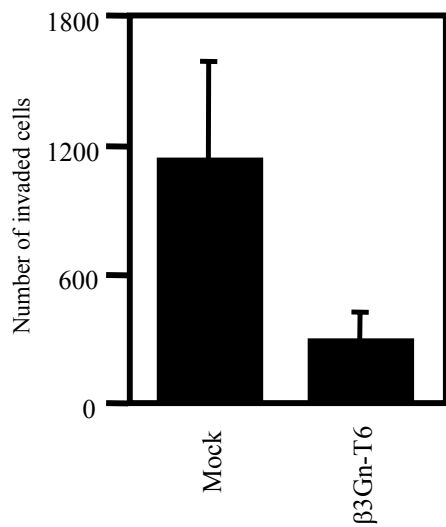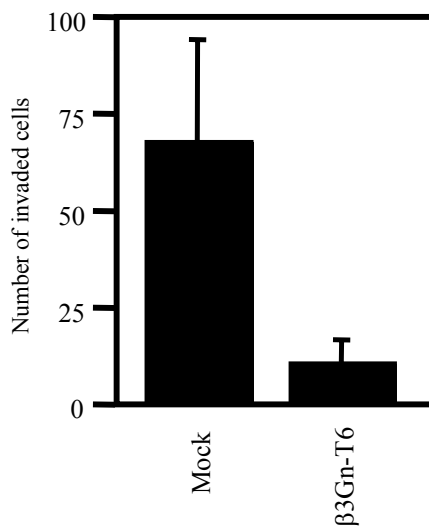

Supplement: pnas_102_12_4572__2.pdf [file pnas_102_12_4572__2.pdf]
